# Supplementary material for: A response‐adaptive randomization procedure for multi‐armed clinical trials with normally distributed outcomes
Source: PubMed Central journal article supplement (PMC7078926; doi:10.1111/biom.13119), 2019-09-19
Supplement: BIOM-76-197-s003.pdf [file BIOM-76-197-s003.pdf]

## **Supporting Information**

Web Appendices may be found in the Supporting Information available with this article on the Wiley Online Library. R code to implement the FLGI method can also be found here.
